# Supplementary material
Source: publisher site journal article supplement (https://www.dovepress.com/article/506485)
Supplement: Supplementary file 1 [file get_supplementary_file.php]

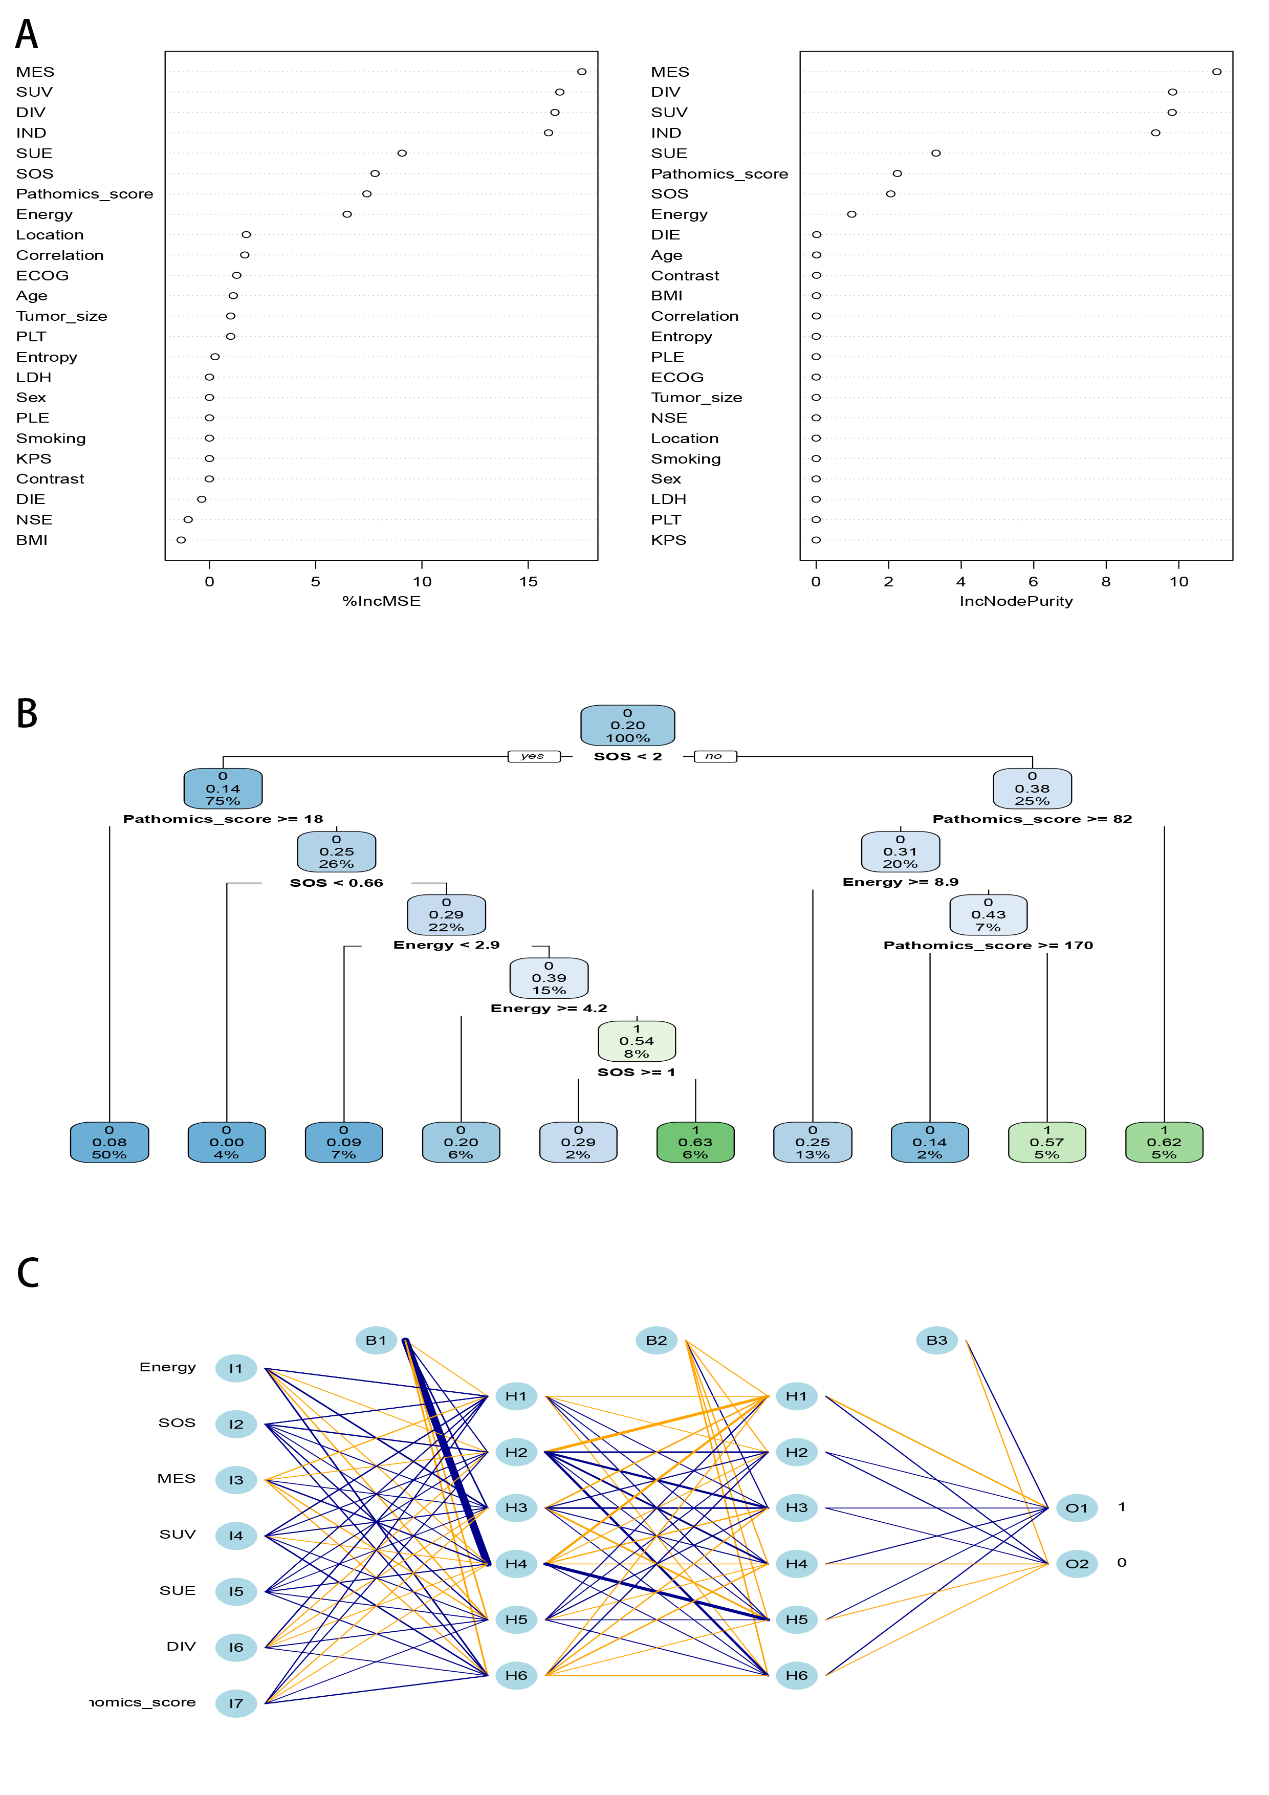


Supplementary figure1. ES-SCLC treatment response prediction model based on machine learning algorithms. (A) Random Forest;(B)Decision tree;(C)Artificial neural network.

Supplementary table1. Inter-group comparison of pathological sections related to pathological histology in ES-SCLC patients

| Pathological parameters | Training cohort | | | p-value | Testing cohort | | | p-value |
| --- | --- | --- | --- | --- | --- | --- | --- | --- |
| Overall(N=216) | Yes(N=45) | No(N=171) | Overall(N=93) | Yes(N=16) | No(N=77) |
| character1 (median [IQR]) | 30.00 [16.00, 47.00] | 74.00 [64.00, 92.00] | 25.00 [12.00, 37.50] | <0.001 | 32.00 [13.00, 44.00] | 75.00 [56.50, 88.00] | 24.00 [10.00, 39.00] | <0.001 |
| character2 (median [IQR]) | 30.00 [15.75, 44.25] | 78.00 [66.00, 89.00] | 25.00 [13.00, 36.50] | <0.001 | 25.00 [13.00, 45.00] | 73.50 [66.50, 84.25] | 21.00 [10.00, 33.00] | <0.001 |
| character3 (median [IQR]) | 29.00 [14.75, 46.00] | 73.00 [58.00, 81.00] | 24.00 [11.00, 34.00] | <0.001 | 31.00 [17.00, 46.00] | 74.00 [60.50, 82.00] | 28.00 [15.00, 37.00] | <0.001 |
| character4 (median [IQR]) | 38.00 [30.00, 49.00] | 85.00 [74.00, 107.00] | 35.00 [29.50, 41.50] | <0.001 | 39.00 [31.00, 46.00] | 92.00 [72.75, 107.25] | 36.00 [28.00, 44.00] | <0.001 |
| character5 (median [IQR]) | 42.00 [33.00, 54.00] | 83.00 [72.00, 95.00] | 38.00 [31.00, 45.00] | <0.001 | 41.00 [32.00, 54.00] | 95.50 [75.25, 101.25] | 35.00 [31.00, 48.00] | <0.001 |
| character6 (median [IQR]) | 45.00 [37.00, 55.00] | 93.00 [66.00, 108.00] | 42.00 [34.50, 49.00] | <0.001 | 47.00 [36.00, 54.00] | 82.00 [72.50, 100.75] | 45.00 [33.00, 50.00] | <0.001 |
| character7 (median [IQR]) | 43.50 [34.00, 53.00] | 87.00 [72.00, 102.00] | 41.00 [31.00, 47.00] | <0.001 | 43.00 [34.00, 51.00] | 93.00 [68.75, 101.50] | 39.00 [33.00, 47.00] | <0.001 |

Abbreviations:IQR=inter-quartile range; Character1=Granularity_5_OrigGray;Character2=StDev_IdentifySecondaryObjects_Texture_Contrast_Hematoxylin;Character3=StDev_IdentifySecondaryObjects_AreaShape_BoundingBoxMinimuM_Y;Character4=StDev_IdentifySecondaryObjects_Areashape_Zernike;Character5=ExecutionTime_09MeasureGranularity;Character6=Correlation_Slope_Eosin_OrigGray;Character7= Granulaity_6_Eosin.

Supplementary table2. Multivariate logistic regression analysis of chemoimmunotherapy response based on pathological histology

| Pathological parameters | Univariate analysis | | | p-value | Multivariate analysis | | | p-value |
| --- | --- | --- | --- | --- | --- | --- | --- | --- |
| OR | 95%CI Lower | 95%CI Upper | OR | 95%CI Lower | 95%CI Upper |
| character1 | 2.36 | 0.23 | 3.85 | <0.01 | 2.28 | 0.41 | 3.56 | <0.01 |
| character2 | 1.18 | 0.16 | 2.91 | <0.05 | 1.21 | 0.32 | 3.07 | <0.01 |
| character3 | 4.03 | 1.03 | 10.23 | <0.01 | 3.99 | 1.15 | 8.25 | <0.01 |
| character4 | 1.63 | 0.88 | 3.54 | <0.01 | 1.72 | 0.96 | 5.23 | <0.01 |
| character5 | 2.26 | 0.78 | 3.89 | <0.01 | 2.31 | 0.87 | 4.13 | <0.01 |
| character6 | 1.09 | 0.16 | 4.06 | <0.01 | 1.13 | 0.24 | 4.76 | <0.01 |
| character7 | 2.91 | 0.99 | 5.17 | <0.01 | 2.87 | 0.78 | 4.99 | <0.01 |

Abbreviations: OR=Odds ratio; 95%CI=95% confidence interval; Character1=Granularity_5_OrigGray;Character2=StDev_IdentifySecondaryObjects_Texture_Contrast_Hematoxylin;Character3=StDev_IdentifySecondaryObjects_AreaShape_BoundingBoxMinimuM_Y;Character4=StDev_IdentifySecondaryObjects_Areashape_Zernike;Character5=ExecutionTime_09MeasureGranularity;Character6=Correlation_Slope_Eosin_OrigGray;Character7= Granulaity_6_Eosin.

Supplementary table3. Multivariate COX regression analysis of overall survival after chemoimmunotherapy based on radiomics and pathomics

| Variables | Univariate analysis | | | p-value | Multivariate analysis | | | p-value |
| --- | --- | --- | --- | --- | --- | --- | --- | --- |
| HR | 95%CI Lower | 95%CI Upper | HR | 95%CI Lower | 95%CI Upper |
| Energy | 2.36 | 1.02 | 3.89 | <0.01 | 2.28 | 0.86 | 3.76 | <0.01 |
| SOS | 1.19 | 0.88 | 3.62 | <0.01 | 1.26 | 0.75 | 3.59 | <0.01 |
| MES | 2.87 | 0.75 | 4.18 | <0.01 | 2.77 | 0.64 | 4.04 | <0.01 |
| SUV | 2.06 | 0.99 | 3.33 | <0.05 | 1.98 | 0.72 | 3.89 | <0.01 |
| SUE | 1.18 | 0.87 | 2.91 | <0.01 | 1.23 | 0.72 | 2.71 | <0.01 |
| DIV | 2.31 | 0.29 | 3.81 | <0.01 | 2.45 | 0.34 | 3.96 | <0.01 |
| Pathomics score | 2.78 | 0.56 | 3.79 | <0.05 | 2.91 | 0.63 | 3.54 | <0.01 |

Abbreviations:HR=Hazard ratio; 95%CI=95% confidence interval.

Supplementary table4. Multivariate COX regression analysis of progression-free survival after chemoimmunotherapy based on radiomics and pathomics

| Variables | Univariate analysis | | | p-value | Multivariate analysis | | | p-value |
| --- | --- | --- | --- | --- | --- | --- | --- | --- |
| HR | 95%CI Lower | 95%CI Upper | HR | 95%CI Lower | 95%CI Upper |
| Energy | 1.59 | 0.16 | 2.29 | <0.01 | 1.63 | 0.26 | 2.94 | <0.01 |
| SOS | 1.06 | 0.54 | 2.41 | <0.01 | 1.17 | 0.71 | 3.11 | <0.01 |
| MES | 2.33 | 0.89 | 3.56 | <0.01 | 2.15 | 0.43 | 3.54 | <0.01 |
| SUV | 1.52 | 0.76 | 2.65 | <0.01 | 1.65 | 0.47 | 3.08 | <0.01 |
| SUE | 1.36 | 0.44 | 2.81 | <0.01 | 1.67 | 0.26 | 3.12 | <0.01 |
| DIV | 2.15 | 1.05 | 4.65 | <0.01 | 1.89 | 0.78 | 3.99 | <0.01 |
| Pathomics score | 1.05 | 0.46 | 3.92 | <0.01 | 1.24 | 0.65 | 4.23 | <0.01 |

Abbreviations:HR=Hazard ratio; 95%CI=95% confidence interval.

Supplementary table5.The distribution of predicted weight values for candidate predictive variables.

| **Variables** | **%IncMSE** | **IncNodePurity** |
| --- | --- | --- |
| Age | 1.123589226 | 0.012425134 |
| Sex | 1.69E-36 | 1.66E-15 |
| BMI | -1.331070409 | 0.005996993 |
| Smoking | -5.34E-36 | 1.81E-15 |
| ECOG | 1.283686696 | 2.37E-15 |
| Location | 1.734240949 | 1.95E-15 |
| Tumor_size | 1.000500375 | 2.15E-15 |
| PLE | -4.49E-37 | 2.57E-15 |
| KPS | -7.69E-21 | 9.65E-16 |
| PLT | 1.000500375 | 1.28E-15 |
| LDH | 2.14E-21 | 1.40E-15 |
| NSE | -1.000500375 | 2.09E-15 |
| Energy | 6.481404453 | 0.982770085 |
| Contrast | -0.006517044 | 0.011069635 |
| Correlation | 1.662613916 | 0.005504378 |
| SOS | 7.793708659 | 2.057294592 |
| IND | 15.95680883 | 9.364905992 |
| MES | 17.52780831 | 11.0519468 |
| SUV | 16.48816741 | 9.8191075 |
| SUE | 9.067850398 | 3.30595839 |
| Entropy | 0.265429628 | 0.000857143 |
| DIV | 16.26072357 | 9.831790432 |
| DIE | -0.362012138 | 0.016587785 |
| Pathomics_score | 7.409845227 | 2.238995498 |

Abbreviations: BMI= Body mass index; ECOG= Eastern cooperative oncology group; PLE= Pleural effusion; KPS= Karnofsky; PLT= Platelet count; LDH= Lactate dehydrogenase; NSE= Neuro-specific enolase; SOS: sum of squares;IND: inverse difference;MES: mean sum;SUV: sum variance;SUE: sum entropy;DIV: difference variance;DIE: difference entropy.
